# Supplementary material
Source: MDPI journal article supplement (https://www.mdpi.com/2073-4395/11/4/693)
Supplement: s1 [file s1]

**Survey carried out among cocoa farms from ASOPROBLEL in the municipalities of  
Belalcazar, Viterbo and San José in Caldas, Colombia**

Project: Unique ID of the project 527661158 (KOCOLATL: A bioeconomy system to valorize  
cacao organic waste into valuable products)

1. What is the name of your farm?
2. What municipality is located the farm?
3. What village is located located the farm?
4. What is the number of members of the family?
5. What is the number of hectares cultivated in cocoa?
6. How many cacao trees do you have in your crop?
7. Do you use any fertilizer in the crop?
8. What varieties of cocoa do you have in your cultivation?
9. What is the age of the crop in years?
10. Do you have other crops on the farm, which ones?
11. What is the production average monthly cocoa at the farm?
12. What is the method of sowing by grafting or by seed?
13. What do you do with the pod husk of the cocoa pod ?
14. Do you have observations regarding the state of the cultivation or the cocoa production process on the farm, which ones?
15. Have you had training in the handling of cocoa pod husk residue?
16. Do you make any kind of bio fertilizer or bio preparation inside the farm?
17. How do you know when a cocoa pod is ready to be harvested?
18. How do you decide harvest times and why?
19. How many ears of corn do you collect in the month?
20. How many of the ears collected in the month are ripe, how many are green, and how many are you looking?
21. What is the georeferenced location of the model farm?
22. What is the precision of the model farm?
23. What is the MSNM height of the crop of the model farm?
24. Do you have email and do you use it?
25. Do you have access to WhatsApp?
26. Do you have a television? Yes / no, what channels do you have access to?
27. Do you have internet access? Otherwise

28. What stations do you listen to and at what times?

29. How is information or training on cocoa cultivation?
